# Supplementary material
Source: PubMed Central journal article supplement (PMC7102742)
Supplement: mmc1.pdf [file mmc1.pdf]

## Supplementary data

**Table A.** Examples of novel avian DNA viruses reported between 2012 and 2014 (as of 21 October 2014) [38, 41-54].

| Virus (avian species)                                                                                         | Place                                            | Clinical significance                                                                                                                       |
|---------------------------------------------------------------------------------------------------------------|--------------------------------------------------|---------------------------------------------------------------------------------------------------------------------------------------------|
| <b><i>Adenoviridae: Aviadenovirus</i></b>                                                                     |                                                  |                                                                                                                                             |
| Gull adenovirus [Herring gull ( <i>Larus argentatus</i> ) & lesser black-backed gull ( <i>Larus fuscus</i> )] | The Netherlands                                  | Histological, virological (electron microscopy) & molecular evidence of infection in dead gulls (cloacal bursa).                            |
| Turkey adenoviruses 4 & 5 (Turkey)                                                                            | 4: Northern Ireland; 5: UK & Hungary             | Unknown                                                                                                                                     |
| <b><i>Adenoviridae: Siadenovirus</i></b>                                                                      |                                                  |                                                                                                                                             |
| South Polar skua adenovirus [South Polar skua ( <i>Catharacta maccormicki</i> )]                              | Lake King Sejong, King George Island, Antarctica | Molecular detection in dead South Polar skuas (heart, trachea, lung, liver, intestine & kidney).                                            |
| Chinstrap penguin adenovirus 1 [Chinstrap penguin ( <i>Pygoscelis antarctica</i> )]                           | Narebski Point, King George Island, Antarctica   | Molecular detection in dead penguin (heart, trachea, lung, liver, liver, intestine & kidney).                                               |
| Gouldian finch adenovirus 1 [Gouldian finches ( <i>Erythrura gouldiae</i> )]                                  | Hungary & Ohio, USA                              | Histological & molecular evidence of infection in healthy & diseased Gouldian finches with variable clinical signs (feces, liver & kidney). |
| <b><i>Adenoviridae: Atadenovirus</i></b>                                                                      |                                                  |                                                                                                                                             |
| Psittacine adenovirus HKU1 [Mealy Parrots ( <i>Amazona farinose</i> )]                                        | Hong Kong, China                                 | Detection in Mealy Parrots (lung, kidney, liver, spleen, & cloacal swab) co-infected with <i>Chlamydophila psittaci</i> during              |

an outbreak of avian chlamydiosis and human psittacosis.

***Circoviridae: Gyrovirus***

Gyrovirus 4 [Chicken]

Hong Kong

Molecular detection in chickens (skin & meat) with possible epidemiological link with humans who have fecal shedding of gyrovirus 4.

***Herpesviridae: Mardivirus***

Phasianid herpesvirus [Moutian peacock pheasant (*Polyplectron inopinatum*), Malayan peacock pheasant (*Polyplectron malacense*) & Congo peafowl (*Afropavo congensis*)]

Bronx Zoo, New York, USA

Molecular detection in dead birds (liver) with histological findings of multifocal necrotizing hepatitis, splenitis & enteritis.

***Herpesviridae: Iltovirus***

Psittacid herpesvirus 3 [Bourke's parrot (*Neopsephotus bourkii*)]

California, USA

Histological, virological (electron microscopy) & molecular evidence of infection in an outbreak of respiratory disease among parrots (lung).

***Papillomaviridae: Papillomavirus***

Pygoscelis adeliae papillomavirus 1 [Adélie penguins (*Pygoscelis adeliae*)]

Cape Crozier, Ross Island, Antarctica

Molecular detection in healthy penguins during breeding season (feces).

***Parvoviridae: Aviparvovirus***

Pigeon parvovirus [Pigeon]

Hong Kong

Molecular detection in healthy pigeons (feces).

***Polyomaviridae: Polyomavirus***

|                                                                                          |                                                                                        |                                                                                                                                                          |
|------------------------------------------------------------------------------------------|----------------------------------------------------------------------------------------|----------------------------------------------------------------------------------------------------------------------------------------------------------|
| NZ budgerigar polyomavirus [Budgerigars ( <i>Melopsittacus undulatus</i> )]              | North Island, New Zealand (2012)                                                       | Molecular detection in healthy and diseased budgerigars with feather abnormalities (blood).                                                              |
| <b><i>Poxviridae: Avipoxvirus</i></b>                                                    |                                                                                        |                                                                                                                                                          |
| Feral pigeonpox viruses 1 & 2 [Feral pigeon ( <i>Columba livia</i> )]                    | Port Elizabeth, South Africa                                                           | Histological & molecular evidence of infection in pigeons with pox lesions around the eyes.                                                              |
| Flamingopox virus [Flamingo ( <i>Phoenicopterus minor</i> )]                             | Kimberley, South Africa                                                                | Histological & molecular evidence of infection in Flamingo with pox lesions on the legs and feet.                                                        |
| Laughing dovepox viruses 1 & 2 [Laughing dove ( <i>Spilopelia senegalensis</i> )]        | South Africa (1: Cape Town; 2: Port Elizabeth)                                         | Histological & molecular evidence of infection in doves with pox lesions.                                                                                |
| Penguinpox virus [Penguin ( <i>Spheniscus demersus</i> )]                                | Cape Town, South Africa                                                                | Histological & molecular evidence of infection in penguins with pox lesions around the eyes.                                                             |
| Pigeonpox viruses 1, 2, 4, & 5 [Racing pigeon ( <i>Columba livia domestica</i> )]        | South Africa (1: Stellenbosch, 2 & 4: Cape Town, 5: Pineview)                          | Histological & molecular evidence of infection in pigeons with pox lesions.                                                                              |
| Rock pigeonpox viruses 1 & 2 [Rock pigeon ( <i>Columba guinea</i> )]                     | Cape Town, South Africa                                                                | Histological & molecular evidence of infection in pigeons with pox lesions.                                                                              |
| Speckled pigeonpox virus 1 [Juvenile rock pigeon (speckled) ( <i>Columba guinea</i> )]   | Cape Town, South Africa                                                                | Molecular evidence of infection in pigeons with severe lesions on the beak and eyes.                                                                     |
| Penguinpoxvirus strains SC & ES [Magellanic penguins ( <i>Spheniscus magellanicus</i> )] | Brazil (SC: Florianópolis, Santa Catarina State; ES: Vila Velha, Espírito Santo State) | Histological & molecular evidence of infection in penguins with cutaneous pox lesions, bronchopneumonia, esophagitis, cardiomegaly & hepatosplenomegaly. |

**Others**

Cyanoramphus nest-associated circular K & X South Island, New Zealand Molecular detection in dead parakeets (tissues & nesting DNA viruses [Yellow-crowned parakeet materials])  
(*Cyanoramphus auriceps*)

Faecal-associated gemycircularvirus-1b, 1c, 3, New Zealand (Chatham Islands, May be a myco-like virus (feces).  
5-10, &12 [Blackbird (*Turdus merula*, 1b, 1c, & Canterbury, and/or South Island)  
9); Chatham Island warbler (*Gerygone  
albofrontata*, 3, 5, & 6); Mallard duck (*Anas  
platyrhynchos*, 7); Chatham Island black robin  
(*Petroica traverse*, 8); European starling (*Sturnus  
vulgaris*, 10); Ostrich (*Struthio camelus*, 12)]

Abbreviations: UK, the United Kingdom; USA, the United States of America.

**Table B.** Examples of novel avian RNA viruses reported between 2012 and 2014 (as of 21 October 2014) [37, 50, 55-75].

| <b>Virus (avian species)</b>                                                                                                                                                                                                                     | <b>Place</b>                                    | <b>Clinical significance</b>                                                                                                                                                          |
|--------------------------------------------------------------------------------------------------------------------------------------------------------------------------------------------------------------------------------------------------|-------------------------------------------------|---------------------------------------------------------------------------------------------------------------------------------------------------------------------------------------|
| <b><i>Astroviridae: Avastrovirus</i></b>                                                                                                                                                                                                         |                                                 |                                                                                                                                                                                       |
| Group 1 avian astroviruses [Lesser whistling duck ( <i>Dendrocygna javanica</i> ) & northern shoveler ( <i>Anas clypeata</i> )]                                                                                                                  | Hong Kong & Cambodia                            | Molecular detection in healthy birds (feces and/or cloacal swabs).                                                                                                                    |
| Group 2 avian astroviruses [Pond heron ( <i>Ardeola</i> sp.), common greenshank ( <i>Tringa nebularia</i> ), black-faced spoonbill ( <i>Platalea minor</i> ), rock dove ( <i>Columba livia</i> ) & spotted dove ( <i>Spilopelia chinensis</i> )] | Hong Kong & Cambodia                            | Molecular detection in healthy birds (feces and/or cloacal swabs).                                                                                                                    |
| Group 3 avian astroviruses [Common wild duck species ( <i>Anas</i> sp.)]                                                                                                                                                                         | Hong Kong                                       | Molecular detection in healthy ducks (feces).                                                                                                                                         |
| Sanderling astrovirus [Sanderling ( <i>Calidris alba</i> )]                                                                                                                                                                                      | Delaware Bay, New Jersey, USA                   | Molecular detection in healthy sanderlings (feces).                                                                                                                                   |
| <b><i>Caliciviridae: Nacovirus</i></b>                                                                                                                                                                                                           |                                                 |                                                                                                                                                                                       |
| Turkey & chicken nacoviruses [Turkey & chicken]                                                                                                                                                                                                  | Brandenburg & Saxony, Germany & the Netherlands | Molecular detection in chickens with histological findings of enteritis & hepatomegaly with foci of intrahepatic necrosis & inflammation, & turkeys with enteritis & rickets (feces). |
| <b><i>Coronaviridae: Gammacoronavirus</i></b>                                                                                                                                                                                                    |                                                 |                                                                                                                                                                                       |
| Duck coronavirus DK2012-CoV [Duck]                                                                                                                                                                                                               | China                                           | Molecular detection in dead ducks (feces).                                                                                                                                            |

|                                                                                            |                               |                                                                                                                         |
|--------------------------------------------------------------------------------------------|-------------------------------|-------------------------------------------------------------------------------------------------------------------------|
| Guinea fowl coronavirus [Guinea fowl ( <i>Numida meleagris</i> )]                          | France                        | Molecular detection in guinea fowls with fulminating disease (X disease) (liver, spleen, pancreas, intestine & kidney). |
| <b>Coronaviridae: Deltacoronavirus</b>                                                     |                               |                                                                                                                         |
| White-eye coronavirus HKU16 [Japanese white-eye ( <i>Zosterops japonicus</i> )]            | Hong Kong                     | Molecular detection in dead white-eyes (rectal swabs).                                                                  |
| Sparrow coronavirus HKU17 [Tree sparrow ( <i>Passer montanus</i> )]                        | Hong Kong                     | Molecular detection in dead sparrows (rectal swabs).                                                                    |
| Magpie robin coronavirus HKU18 [Oriental magpie-robin ( <i>Copsychus saularis</i> )]       | Hong Kong                     | Molecular detection in dead magpie-robins (rectal swabs).                                                               |
| Night heron coronavirus HKU19 [Black-crowned night heron ( <i>Nycticorax nycticorax</i> )] | Hong Kong                     | Molecular detection in dead herons (rectal swabs).                                                                      |
| Wigeon coronavirus HKU20 [Eurasian wigeon ( <i>Anas penelope</i> )]                        | Hong Kong                     | Molecular detection in dead wigeons (rectal swabs).                                                                     |
| Common moorhen coronavirus HKU21 [Common moorhen ( <i>Callinula chloropus</i> )]           | Hong Kong                     | Molecular detection in dead common moorhens (rectal swabs).                                                             |
| Ruddy turnstone coronavirus [Ruddy turnstone ( <i>Arenaria interpres</i> )]                | Delaware Bay, New Jersey, USA | Molecular detection in healthy turnstones (rectal swabs).                                                               |
| <b>Flaviviridae: Flavivirus</b>                                                            |                               |                                                                                                                         |
| Tembus virus ZJ-6 [Pekin duckling ( <i>Anas</i> )]                                         | Zhejiang, China               | Molecular detection in ducklings with egg drop syndrome                                                                 |

---

*platyrhynchos*]

& histological findings of hemorrhagic hepatic & cerebral necrosis in ducklings (cloacal swabs, feces, brain & ovary).

JS804 virus (Goose)

Jiangsu, China

Molecular detection in geese with egg drop syndrome & histological findings of hemorrhagic hepatic, cerebral, & ovarian lesions, splenomegaly & ruptured ovarian follicles with peritonitis. (brain, spleen & ovary)

***Orthomyxoviridae: Orthomyxovirus***

Cygnets River virus [Muscovy duck (*Cairina moschata*)]

Cygnets River, Kangaroo Island,  
South Australia

Histological, virological (culture) & molecular evidence of infection in an outbreak of fatal disease in Muscovy ducks (liver, brain, lung, spleen & intestine) coinfecting with *Salmonella enterica* serovar Typhimurium.

***Paramyxoviridae: Avulavirus***

Avian paramyxovirus 11 [Common snipe (*Gallinago gallinago*)]

France

Molecular detection in healthy snipes (cloacal swabs).

***Picobirnaviridae: Picobirnavirus***

Turkey picobirnavirus [Commercial turkey (*Meleagris gallopavo*)]

North Carolina, USA

Molecular detection in turkeys with enteric diseases (intestine).

***Picornaviridae: Aalivirus***

***Aalivirus***

Aalivirus A [Pekin duck (*Anas platyrhynchos*)]

China

Molecular detection in diseased ducks (feces).

---

|                                                                                                          |                                |                                                                                                  |
|----------------------------------------------------------------------------------------------------------|--------------------------------|--------------------------------------------------------------------------------------------------|
| <b><i>Picornaviridae: Avisivirus</i></b>                                                                 |                                |                                                                                                  |
| Turkey avisivirus 1 [Commercial turkey ( <i>Meleagris gallopavo</i> )]                                   | Hungary                        | Molecular detection in healthy & diseased turkeys with enteric and/or stunting syndrome (feces). |
| <b><i>Picornaviridae: Kobuvirus</i></b>                                                                  |                                |                                                                                                  |
| SZAL6-KoV/2011/HUN [European roller ( <i>Coracias garrulus</i> )]                                        | Hungary                        | Molecular detection in healthy rollers (feces).                                                  |
| <b><i>Picornaviridae: Kunsagivirus</i></b>                                                               |                                |                                                                                                  |
| Greplavirus A [European roller ( <i>Coracias garrulus</i> )]                                             | Hungary                        | Molecular detection in healthy rollers (feces).                                                  |
| <b><i>Picornaviridae: Megrivirus</i></b>                                                                 |                                |                                                                                                  |
| Mesiviruses-1& 2 (Pigeon)                                                                                | Hong Kong & Hungary            | Molecular detection in healthy pigeons (feces).                                                  |
| <b><i>Picornaviridae: Orthoturdivirus</i></b>                                                            |                                |                                                                                                  |
| Gallivirus [Broiler chicken ( <i>Gallus gallus domesticus</i> ) & turkey ( <i>Meleagris gallopavo</i> )] | Delaware & North Carolina, USA | Molecular detection in chickens and turkeys with runting-stunting enteritis (feces).             |
| Turkey picornavirus [Turkey ( <i>Meleagris gallopavo</i> )]                                              | Hungary                        | Molecular detection in healthy & diseased turkeys with enteric and/or stunting syndrome (feces). |
| <b><i>Picornaviridae: Sapelovirus</i></b>                                                                |                                |                                                                                                  |
| Quail picornavirus [Common quail ( <i>Coturnix coturnix</i> )]                                           | Hungary                        | Molecular detection in dead quails (feces).                                                      |
| <b><i>Picornaviridae: Sicinivirus</i></b>                                                                |                                |                                                                                                  |
| Sicinivirus 1 [Broiler chickens ( <i>Gallus gallus domesticus</i> )]                                     | Ireland (2013)                 | Molecular detection in healthy chickens (feces).                                                 |
| <b><i>Reoviridae: Orbivirus</i></b>                                                                      |                                |                                                                                                  |

|                                                                          |                              |                                                                                                                                                                 |
|--------------------------------------------------------------------------|------------------------------|-----------------------------------------------------------------------------------------------------------------------------------------------------------------|
| Sathuvachari virus [Starlings ( <i>Brahminy myna</i> )]                  | Vellore, Tamil Nadu, India   | Molecular detection in healthy starlings.                                                                                                                       |
| <b><i>Reoviridae: Orthoreovirus</i></b>                                  |                              |                                                                                                                                                                 |
| Duck-pathogenic orthoreovirus [Pekin duck ( <i>Anas platyrhynchos</i> )] | China                        | Histological, virological (culture) & molecular evidence of infection in an outbreak of fatal disease among Pekin ducks with depression & leg weakness (liver). |
| <b><i>Reoviridae: Rotavirus</i></b>                                      |                              |                                                                                                                                                                 |
| Group G pigeon rotavirus (Pigeon)                                        | Hong Kong                    | Molecular detection in healthy pigeons (feces).                                                                                                                 |
| <b><i>Rhabdoviridae: unclassified genus</i></b>                          |                              |                                                                                                                                                                 |
| Farmington virus (Unidentified wild bird)                                | Farmington, Connecticut, USA | Unknown, originally isolated from an unidentified wild bird captured during an outbreak investigation of Eastern equine encephalitis.                           |

Abbreviations: USA, the United States of America.
